# Supplementary material for: Exonuclease III-assisted signal amplification strategy for sensitive fluorescence detection of polynucleotide kinase based on poly(thymine)-templated copper nanoparticles
Source: Royal Society of Chemistry journal article supplement (doi:10.1039/c9an01659g), 2019-01-01
Supplement: c9an01659g1.pdf [file c9an01659g1.pdf]

## **Electronic Supplementary Information**

# **Exonuclease III-assisted signal amplification strategy for sensitive fluorescence detection of polynucleotide kinase based on poly(thymine)-templated copper nanoparticles**

**Han Zhao <sup>a</sup>, Ying Yan <sup>a</sup>, Mingjian Chen <sup>a</sup>, Tingting Hu <sup>a</sup>, Kefeng Wu <sup>a</sup>,**

**Haisheng Liu <sup>a</sup>, Changbei Ma <sup>a,\*</sup>**

<sup>a</sup> School of Life Sciences, Central South University, Changsha 410013, China

\*Authors to whom correspondence should be addressed; E-mails:

macb2012@csu.edu.cn.

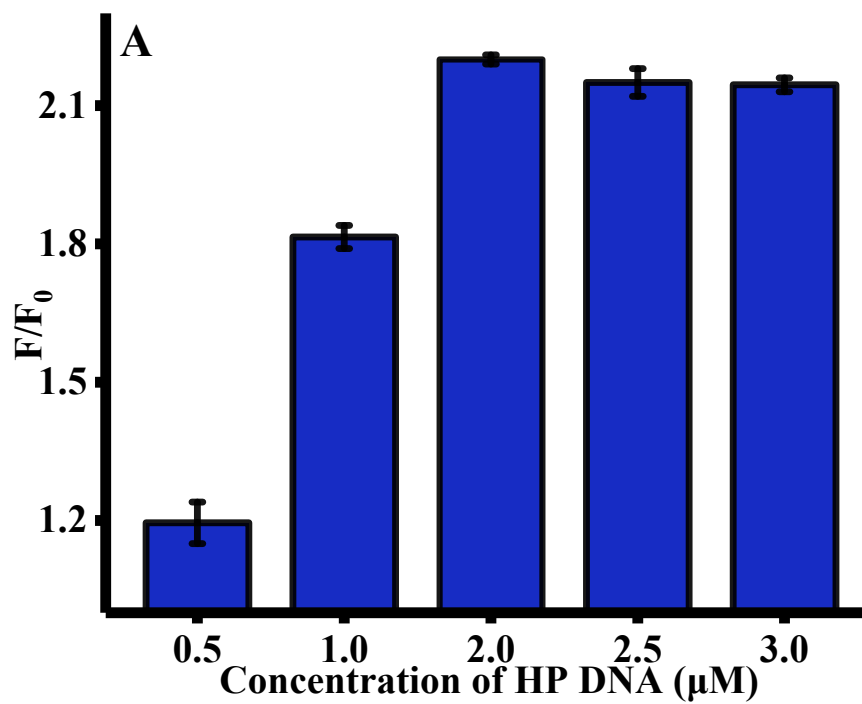

**Fig. S1** Optimization of the concentration of HP DNA probe. Error bars represent the standard deviation of three experiments.

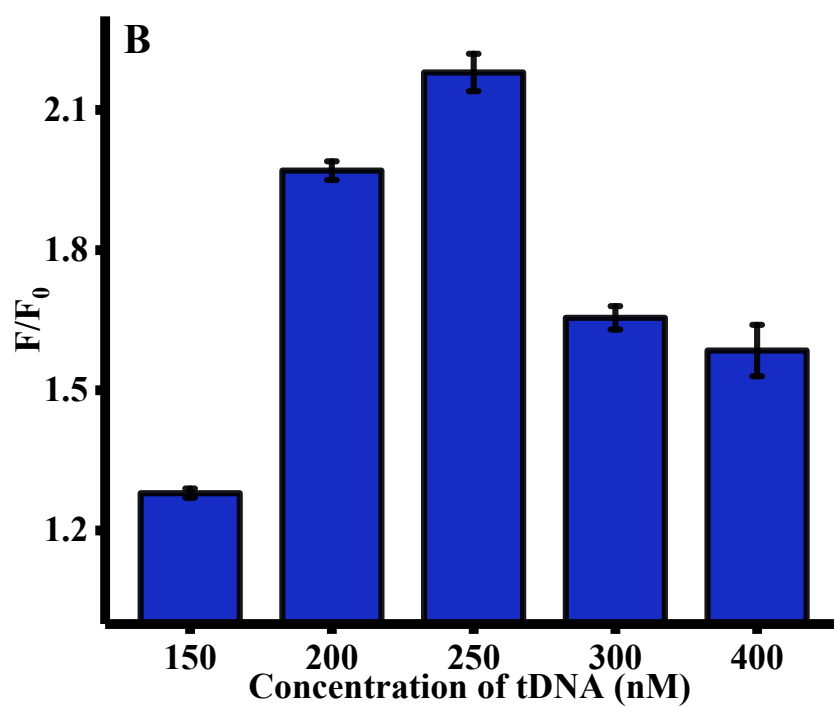

**Fig. S2** Optimization of the concentration of tDNA. Error bars represent the standard deviation of three experiments.

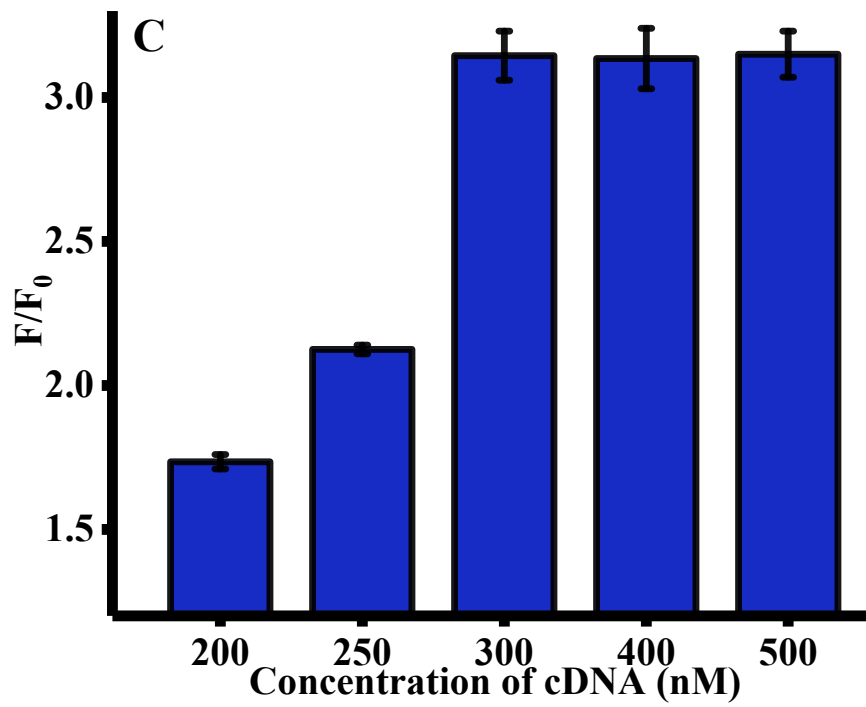

**Fig. S3** Optimization of the concentration of cDNA. Error bars represent the standard deviation of three experiments.

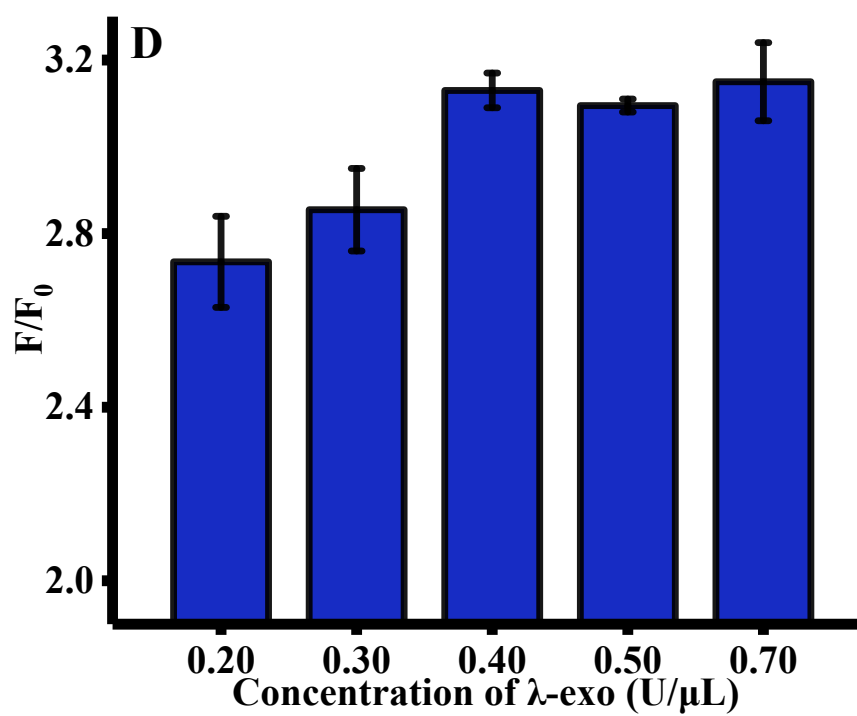

**Fig. S4** Optimization of the concentration of  $\lambda$  exo. Error bars represent the standard deviation of three experiments.

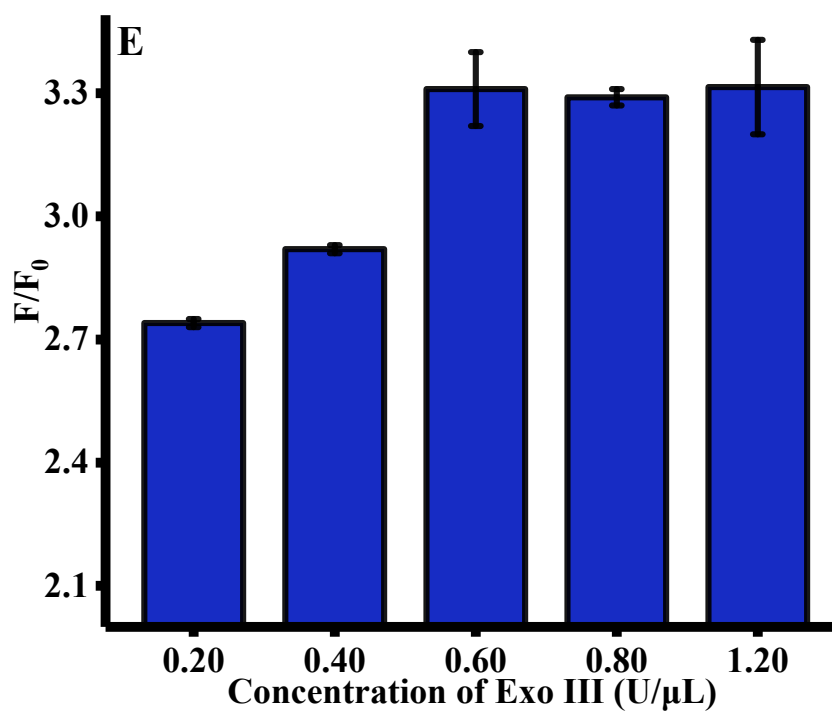

**Fig. S5** Optimization of the concentration of Exo III. Error bars represent the standard deviation of three experiments.

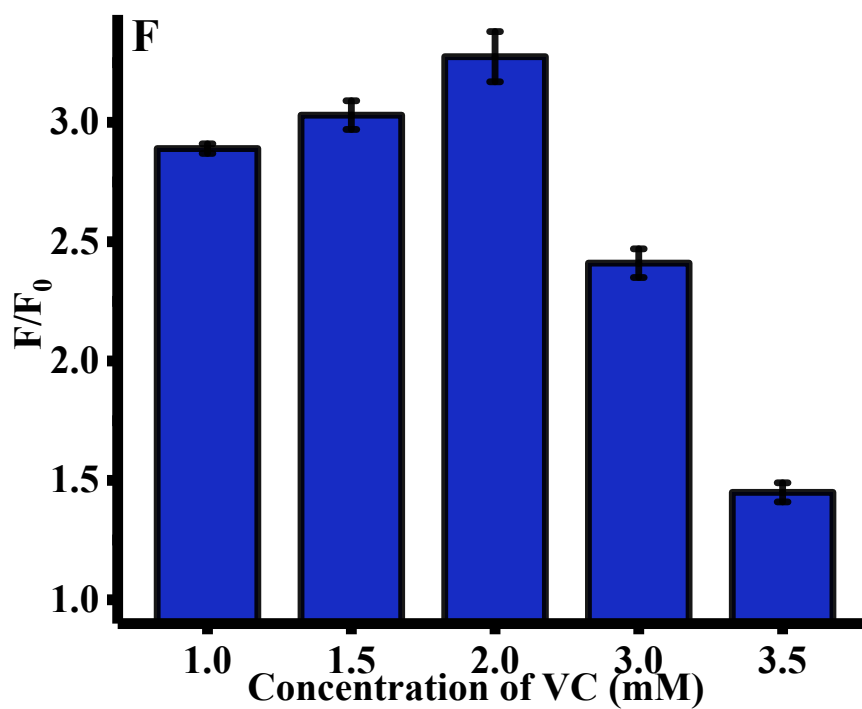

**Fig. S6** Optimization of the concentration of VC. Error bars represent the standard deviation of three experiments.

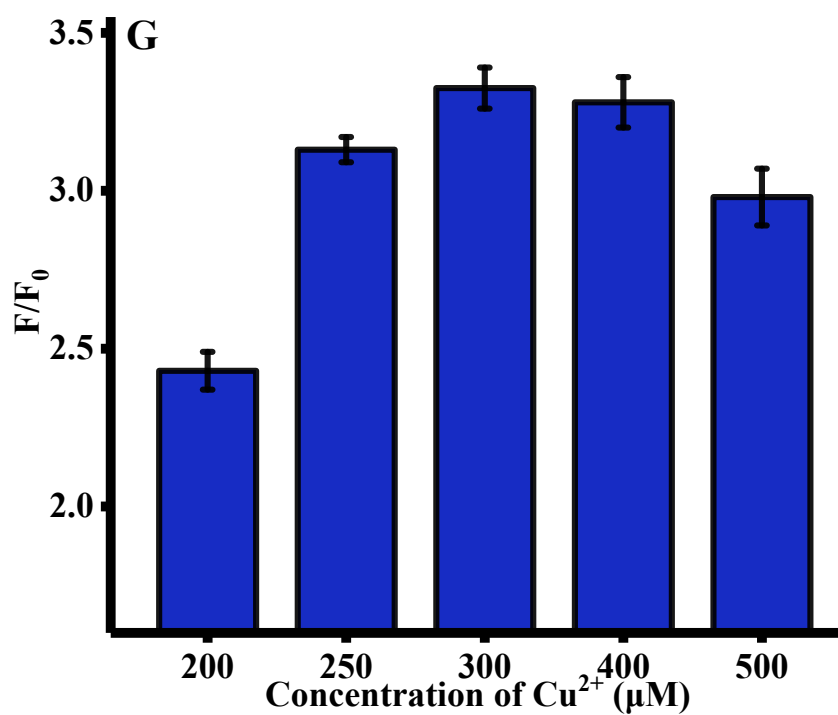

**Fig. S7** Optimization of the concentration of  $\text{Cu}^{2+}$ . Error bars represent the standard deviation of three experiments.
